# Supplementary material for: Prediction of the dopant activity of chemical compounds against ammonia borane with key descriptors: electronegativity and crystal structures
Source: Royal Society of Chemistry journal article supplement (doi:10.1039/c6nj01793b), 2016-01-01
Supplement: c6nj01793b1.pdf [file c6nj01793b1.pdf]

## Supporting Information

### Predicting dopant activity of chemical compounds against ammonia borane with key descriptors: electronegativity and crystal structure

Keisuke Takahashi\*

*Center for Materials research by Information Integration (CMI<sup>2</sup>),*

*National Institute for Materials Science (NIMS),*

*1-2-1 Sengen, Tsukuba, Ibaraki 305-0047, Japan and*

*Graduate School of Engineering, Hokkaido University, N-13, W-8, Sapporo 060-8628, Japan*

Yuki Nakagawa

*Graduate School of Engineering, Hokkaido University, N-13, W-8, Sapporo 060-8628, Japan*

Lauren Takahashi

*Freelance Researcher, Central Ward, Sapporo 064, Japan*

Shigehito Isobe

*Graduate School of Engineering, Hokkaido University, N-13, W-8, Sapporo 060-8628, Japan*

(Dated: July 15, 2016)

#### I. EXPERIMENTAL METHOD

Detailed descriptions of materials used in experiments are as follows: Ammonia borane (Sigma Aldrich, 97 %), CuCl<sub>2</sub> (Sigma Aldrich, 99.995 %), Nb (Kojundo Chemical Lab., 99.99 %), NbF<sub>5</sub> (Sigma Aldrich, 98 %), NbO (Kojundo Chemical Lab., 99.99 %), Nb<sub>2</sub>O<sub>5</sub> (Kojundo Chemical Lab., 99.99 %), TiH<sub>2</sub> (Sigma Aldrich, 98 %). All of the samples are handled in a glovebox filled with purified Ar atmosphere in order to prevent oxidation. Each of the above materials is mixed with ammonia borane using a planetary ball-mill apparatus (Fritsch Pulverisette 7) with 20 stainless steel balls (7 mm in diameter) and 300 mg samples (ball : powder ratio = 70 : 1, by mass). The milling process is performed under 0.1 MPa Ar atmosphere. The total milling process time and additive amount is collected in Table 1. Please note that some mixtures are prepared by hand-mixing in a glovebox where the milling time of 5 min indicates the hand mixing. Hydrogen desorption temperature of ammonia borane is analyzed by thermal mass spectrometry measurements (TDMS, ULVAC, BGM-102) combined with thermogravimetry and differential thermal analysis (TG-DTA, Bruker, 2000SA).

#### II. EXPERIMENTAL DATA SET

The experimental data is collected in Table 1. Sample numbers 18, 33, 48, 49, 50, 51, 52, 53, and 54 are experimentally performed where other samples are acquired from previous work as well as other researchers work.

#### III. EXPERIMENTAL RESULT

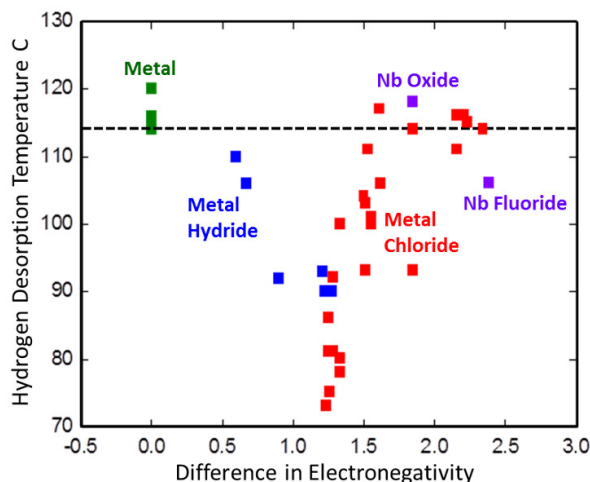

FIG. 1: The difference in electronegativity of chemical compounds and corresponding desorption temperature of ammonia borane in experiment. Data is classified by the phases of dopants. Dash line indicates the H<sub>2</sub> desorption temperature of ammonia borane without dopants

The difference in electronegativity of chemical compounds, which are classified by the phase of the dopant, and the corresponding desorption temperature of ammonia borane is shown in Figure 1. Please note that dispersion of metal chlorides is due to various experimental conditions of metal chlorides data sampled as seen in Table 1. However, the fundamental correlation of electronegativity and desorption temperature are the same in principle.

\* keisuke.takahashi@eng.hokudai.ac.jp

**A. Table 1**

| No. | additive | Crystal Structure | milling Time | amount (mol%) | melting point | Formation enthalpy | Formation entropy | $\chi$ p of cation | $\chi$ p of anion | $\chi$ p difference | Electron affinity of cation | Electron affinity of anion | cation valence | Desorption temperature | heating rate ( $^{\circ}\text{C}_{\text{min}}^{-1}$ ) | Note  |
|-----|----------|-------------------|--------------|---------------|---------------|--------------------|-------------------|--------------------|-------------------|---------------------|-----------------------------|----------------------------|----------------|------------------------|-------------------------------------------------------|-------|
| 1   | KCl      | cubic             | 60           | 10            | 770           | -436               | 83                | 0.82               | 3.16              | 2.34                | 0.5                         | 3.61                       | 1              | 114                    | 3                                                     | Ref.5 |
| 2   | NaCl     | cubic             | 60           | 10            | 801           | -411               | 72                | 0.93               | 3.16              | 2.23                | 0.55                        | 3.61                       | 1              | 115                    | 3                                                     | Ref.5 |
| 3   | SrCl2    | monoclinic        | 60           | 10            | 874           | -829               | 115               | 0.95               | 3.16              | 2.21                | 0.05                        | 3.61                       | 2              | 116                    | 3                                                     | Ref.5 |
| 4   | LiCl     | cubic             | 60           | 10            | 605           | -408               | 59                | 0.98               | 3.16              | 2.18                | 0.62                        | 3.61                       | 1              | 116                    | 3                                                     | Ref.5 |
| 5   | CaCl2    | orthorhombic      | 60           | 10            | 772           | -795               | 108               | 1                  | 3.16              | 2.16                | 0.02                        | 3.61                       | 2              | 116                    | 3                                                     | Ref.5 |
| 6   | MgCl2    | rhombic           | 60           | 10            | 714           | -641               | 90                | 1.31               | 3.16              | 1.85                | 0                           | 3.61                       | 2              | 114                    | 3                                                     | Ref.5 |
| 7   | TiCl3    | rhombic           | 60           | 10            | 425           | -315               | 140               | 1.54               | 3.16              | 1.62                | 0.08                        | 3.61                       | 3              | 106                    | 3                                                     | Ref.5 |
| 8   | MnCl2    | rhombic           | 60           | 10            | 654           | -481               | 118               | 1.55               | 3.16              | 1.61                | 0                           | 3.61                       | 2              | 117                    | 3                                                     | Ref.5 |
| 9   | AlCl3    | monoclinic        | 60           | 10            | 192           | -704               | 111               | 1.61               | 3.16              | 1.55                | 0.43                        | 3.61                       | 3              | 101                    | 3                                                     | Ref.5 |
| 10  | VCl3     | hexagonal         | 60           | 10            | 300           | -581               | 131               | 1.63               | 3.16              | 1.53                | 0.53                        | 3.61                       | 3              | 111                    | 3                                                     | Ref.5 |
| 11  | ZnCl2    | orthorhombic      | 60           | 10            | 275           | -415               | 110               | 1.65               | 3.16              | 1.51                | 0                           | 3.61                       | 2              | 103                    | 3                                                     | Ref.5 |
| 12  | CrCl2    | orthorhombic      | 60           | 10            | 820           | -395               | 115               | 1.66               | 3.16              | 1.5                 | 0.67                        | 3.61                       | 2              | 104                    | 3                                                     | Ref.5 |
| 13  | FeCl2    | rhombic           | 60           | 10            | 677           | -342               | 118               | 1.83               | 3.16              | 1.33                | 0.15                        | 3.61                       | 2              | 78                     | 3                                                     | Ref.5 |
| 14  | CoCl2    | rhombic           | 60           | 10            | 735           | -313               | 109               | 1.88               | 3.16              | 1.28                | 0.66                        | 3.61                       | 2              | 81                     | 3                                                     | Ref.5 |
| 15  | CuCl2    | monoclinic        | 5            | 1             | 498           | -220               | 108               | 1.9                | 3.16              | 1.26                | 1.24                        | 3.61                       | 2              | 108                    | 3                                                     | Ref.5 |
| 16  | CuCl2    | monoclinic        | 5            | 5             | 498           | -220               | 108               | 1.9                | 3.16              | 1.26                | 1.24                        | 3.61                       | 2              | 103                    | 3                                                     | Ref.5 |
| 17  | CuCl2    | monoclinic        | 5            | 10            | 498           | -220               | 108               | 1.9                | 3.16              | 1.26                | 1.24                        | 3.61                       | 2              | 75                     | 3                                                     | Ref.5 |
| 18  | CuCl2    | monoclinic        | 5            | 20            | 498           | -220               | 108               | 1.9                | 3.16              | 1.26                | 1.24                        | 3.61                       | 2              | 69                     | 3                                                     | Ref.5 |
| 19  | CuCl2    | monoclinic        | 60           | 10            | 498           | -220               | 108               | 1.9                | 3.16              | 1.26                | 1.24                        | 3.61                       | 2              | 75                     | 3                                                     | Ref.5 |
| 20  | NiCl2    | rhombic           | 60           | 10            | 1001          | -316               | 107               | 1.91               | 3.16              | 1.25                | 1.16                        | 3.61                       | 2              | 81                     | 3                                                     | Ref.5 |
| 21  | AgCl     | cubic             | 60           | 2             | 1547          | -127               | 96                | 1.93               | 3.16              | 1.23                | 1.3                         | 3.61                       | 1              | 109                    | 3                                                     | Ref.5 |
| 22  | AgCl     | cubic             | 60           | 10            | 1547          | -127               | 96                | 1.93               | 3.16              | 1.23                | 1.3                         | 3.61                       | 1              | 105                    | 3                                                     | Ref.5 |
| 23  | AgCl     | cubic             | 60           | 20            | 1547          | -127               | 96                | 1.93               | 3.16              | 1.23                | 1.3                         | 3.61                       | 1              | 73                     | 3                                                     | Ref.5 |
| 24  | FeCl2    | rhombic           | 5            | 5.7           | 677           | -342               | 118               | 1.83               | 3.16              | 1.33                | 0.15                        | 3.61                       | 2              | 80                     | 1                                                     | Ref.1 |
| 25  | NiCl2    | rhombic           | 5            | 5.6           | 1001          | -316               | 107               | 1.91               | 3.16              | 1.25                | 1.16                        | 3.61                       | 2              | 86                     | 1                                                     | Ref.1 |
| 26  | ZnCl2    | orthorhombic      | 5            | 5.4           | 275           | -415               | 110               | 1.65               | 3.16              | 1.51                | 0                           | 3.61                       | 2              | 93                     | 1                                                     | Ref.1 |
| 27  | PtCl2    | orthorhombic      | 5            | 2.8           | 581           | -123               | 120               | 2.28               | 3.16              | 0.88                | 2.13                        | 3.61                       | 2              | 94                     | 1                                                     | Ref.1 |
| 28  | CoCl2    | rhombic           | 5            | 2.6           | 735           | -313               | 109               | 1.88               | 3.16              | 1.28                | 0.66                        | 3.61                       | 2              | 92                     | 1                                                     | Ref.2 |
| 29  | FeCl3    | rhombic           | 5            | 2.1           | 306           | -399               | 142               | 1.83               | 3.16              | 1.33                | 0.15                        | 3.61                       | 3              | 100                    | 1                                                     | Ref.2 |
| 30  | AlCl3    | monoclinic        | 5            | 2.5           | 192           | -704               | 111               | 1.61               | 3.16              | 1.55                | 0.43                        | 3.61                       | 3              | 100                    | 1                                                     | Ref.2 |
| 31  | MgCl2    | rhombic           | 120          | 33            | 714           | -641               | 90                | 1.31               | 3.16              | 1.85                | 0                           | 3.61                       | 2              | 93                     | 5                                                     | Ref.3 |
| 32  | CaCl2    | orthorhombic      | 120          | 33            | 772           | -795               | 108               | 1                  | 3.16              | 2.16                | -0.02                       | 3.61                       | 2              | 111                    | 5                                                     | Ref.3 |
| 33  | Nb       | cubic             | 60           | 2             | 2477          | 0                  | 36                | 1.6                | -                 | -                   | 0.92                        | -                          | 0              | 120                    | 3                                                     | Ref.5 |
| 34  | Ti       | hexagonal         | 60           | 10            | 1668          | 0                  | 31                | 1.54               | -                 | -                   | 0.08                        | -                          | 0              | 115                    | 3                                                     | Ref.5 |
| 35  | V        | cubic             | 60           | 10            | 1910          | 0                  | 29                | 1.63               | -                 | -                   | 0.53                        | -                          | 0              | 116                    | 3                                                     | Ref.5 |
| 36  | Cr       | cubic             | 60           | 10            | 1907          | 0                  | 24                | 1.66               | -                 | -                   | 0.67                        | -                          | 0              | 115                    | 3                                                     | Ref.5 |
| 37  | Mn       | cubic             | 60           | 10            | 1246          | 0                  | 32                | 1.55               | -                 | -                   | 0                           | -                          | 0              | 116                    | 3                                                     | Ref.5 |
| 38  | Fe       | cubic             | 60           | 10            | 1538          | 0                  | 27                | 1.83               | -                 | -                   | 0.15                        | -                          | 0              | 115                    | 3                                                     | Ref.5 |
| 39  | Co       | hexagonal         | 60           | 10            | 1495          | 0                  | 30                | 1.88               | -                 | -                   | 0.66                        | -                          | 0              | 116                    | 3                                                     | Ref.5 |
| 40  | Ni       | cubic             | 60           | 10            | 1455          | 0                  | 30                | 1.91               | -                 | -                   | 1.16                        | -                          | 0              | 116                    | 3                                                     | Ref.5 |
| 41  | Cu       | cubic             | 60           | 10            | 1085          | 0                  | 33                | 1.9                | -                 | -                   | 1.24                        | -                          | 0              | 116                    | 3                                                     | Ref.5 |
| 42  | Zn       | hexagonal         | 60           | 10            | 420           | 0                  | 42                | 1.65               | -                 | -                   | 0                           | -                          | 0              | 114                    | 3                                                     | Ref.5 |
| 43  | NaH      | cubic             | 30           | 50            | 800           | -56                | 40                | 0.93               | 2.2               | 1.27                | 0.55                        | 0.75                       | 1              | 90                     | 2                                                     | Ref.4 |
| 44  | LiH      | cubic             | 30           | 50            | 692           | -91                | 171               | 0.98               | 2.2               | 1.22                | 0.62                        | 0.75                       | 1              | 90                     | 2                                                     | Ref.4 |
| 45  | CaH2     | orthorhombic      | 30           | 50            | 816           | -182               | 41                | 1                  | 2.2               | 1.2                 | 0.02                        | 0.75                       | 2              | 93                     | 2                                                     | Ref.4 |
| 46  | MgH2     | tetragonal        | 30           | 50            | 285           | -75                | 31                | 1.31               | 2.2               | 0.89                | 0                           | 0.75                       | 2              | 92                     | 2                                                     | Ref.4 |
| 47  | AlH3     | rhombic           | 30           | 50            | 150           | -11                | 30                | 1.61               | 2.2               | 0.59                | 0.43                        | 0.75                       | 3              | 110                    | 2                                                     | Ref.4 |
| 48  | TiH2     | cubic             | 30           | 50            | 350           | -120               | 30                | 1.54               | 2.2               | 0.66                | 0.08                        | 0.75                       | 2              | 106                    | 2                                                     | Ref.4 |
| 49  | NbF5     | monoclinic        | 60           | 2             | 73            | -1814              | 160               | 1.6                | 3.98              | 2.38                | 0.92                        | 3.4                        | 5              | 106                    | 3                                                     | Ref.5 |
| 50  | NbO      | cubic             | 60           | 2             | 1940          | -406               | 48                | 1.6                | 3.44              | 1.84                | 0.92                        | 1.46                       | 2              | 118                    | 3                                                     | Ref.5 |
| 51  | Nb2O5    | monoclinic        | 60           | 1             | 1520          | -1900              | 137               | 1.6                | 3.44              | 1.84                | 0.92                        | 1.46                       | 5              | 118                    | 3                                                     | Ref.5 |
| 52  | AB       |                   | 60           | 0             |               |                    |                   |                    |                   |                     |                             |                            |                | 114                    | 3                                                     | Ref.5 |
| 53  | AB       |                   | 0            | 0             |               |                    |                   |                    |                   |                     |                             |                            |                | 117                    | 3                                                     | Ref.5 |

References

Ref.1 F. Toche, R. Chiriac, U. B. Demirci, P. Miele, International Journal of Hydrogen Energy 37, 6749 (2012).  
 Ref.2 R. Benzouaa, U. B. Demirci, R. Chiriac, F. Toche, P. Miele, Thermochimica Acta 509, 81 (2010).  
 Ref.3 Y. Li, F. Fang, Y. Song, Y. Li, Q. Zhang, L. Ouyang, M. Zhu, D. Sun, International Journal of Hydrogen Energy 37, 4274 (2012).  
 Ref.4 Y. Nakagawa, S. Isobe, Y. Ikarashi, S. Ohnuki, Journal of Materials Chemistry A, 2, 3926 (2014).  
 Ref.5 Y. Nakagawa, T. Zhang, M. Kitamura, S. Isobe, S. Hino, N. Hashimoto, S. Ohnuki, J. Chem. Eng. Data, 2016, 61 (5), 1924–129
